# Supplementary material
Source: MDPI journal article supplement (https://www.mdpi.com/1999-4907/7/10/219)
Supplement: s1 [file s1]

Supplementary Materials: Fire Regime in Marginal Jack Pine Populations at Their Southern Limit of Distribution, Riding Mountain National Park, Central Canada

Jacques C. Tardif, Stephen Cornelsen, France Conciatori, Eben Blake Hodgin and
Marlow G. Pellatt


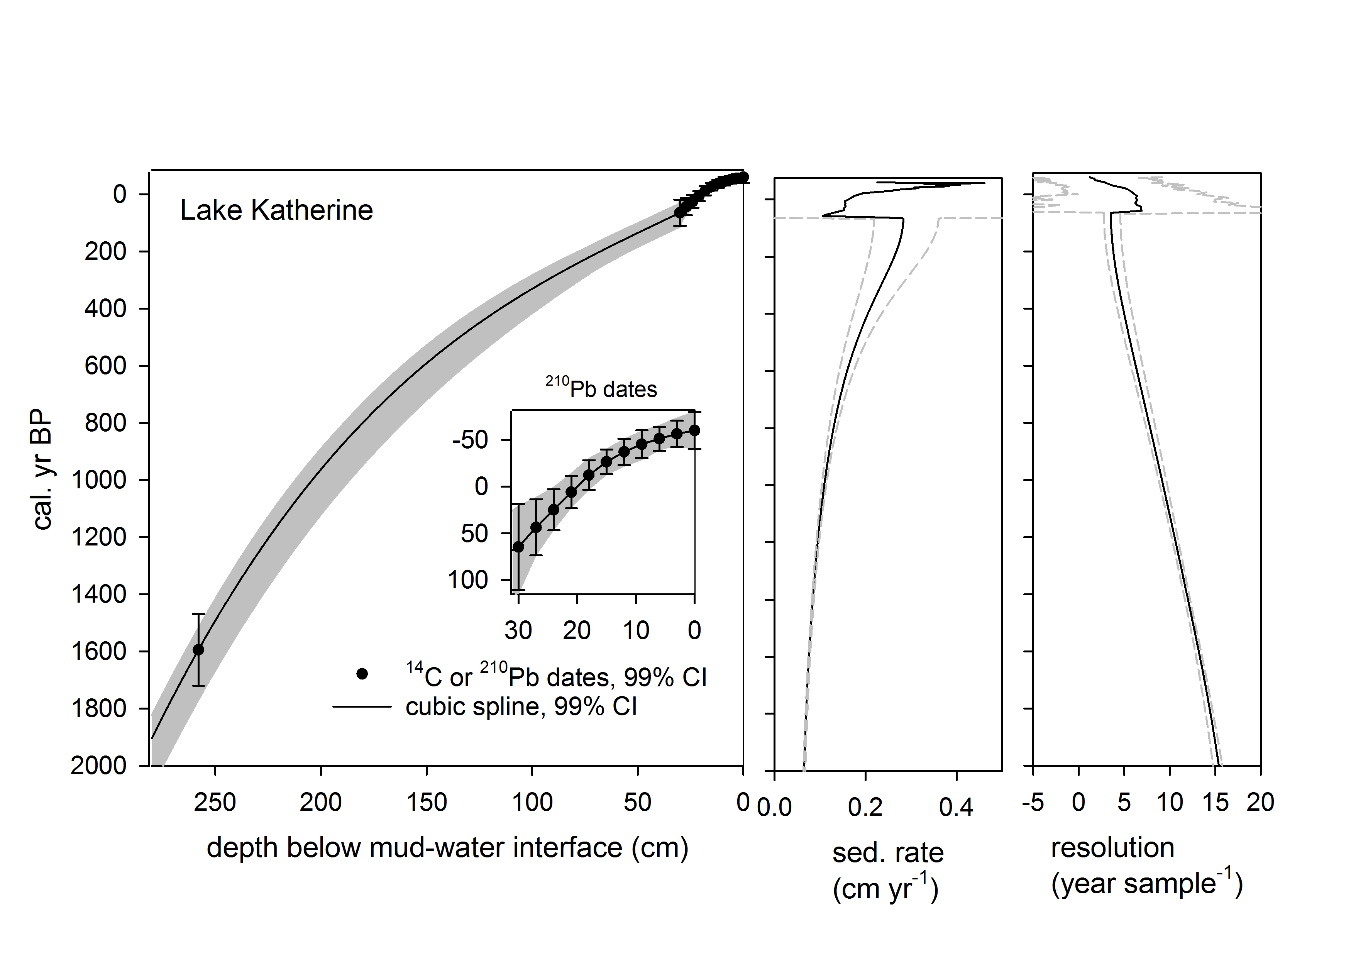


**Figure S1.** Age-depth model for Lake Katherine based on eleven 210Pb and two radiocarbon dates. Only the 1st radiocarbon date is shown. The two sub-figures on the right show the sediment accumulation rate and the sample resolution. The period of analysis presented in this study correspond roughly to the first 140 cm of sediment.
